# Supplementary material for: The Impact of Negative Symptoms and Neurocognition on Functioning in MDD and Schizophrenia
Source: PubMed Central journal article supplement (PMC8350050; doi:10.3389/fpsyt.2021.648108), 2021-07-26
Supplement: Table_1.pdf [file Table_1.pdf]

**Table 1. Association between MIRECC-GAF and NSA-16 global impression scores**

| MIRECC-GAF components | MDD     | SCZ     | HC    |
|-----------------------|---------|---------|-------|
| Occupational          | -0.30*  | -0.32*  | 0.02  |
| Social                | -0.29*  | -0.44** | -0.18 |
| Symptomatic           | -0.46** | -0.29*  | -0.02 |

Data was analysed using Spearman's rank correlation; \* $p < 0.05$ , \*\* $p < 0.01$

Abbreviations: MIRECC-Global Assessment of Functioning, MIRECC-GAF
