# Supplementary material for: The Impact of Negative Symptoms and Neurocognition on Functioning in MDD and Schizophrenia
Source: PubMed Central journal article supplement (PMC8350050; doi:10.3389/fpsyt.2021.648108), 2021-07-26
Supplement: Table_2.pdf [file Table_2.pdf]

**Table 2. Association between MIRECC-GAF functioning components and BACS components**

| BACS components  | MDD               |                    |                    | SCZ                 |                    |                     | HC    |       |       |
|------------------|-------------------|--------------------|--------------------|---------------------|--------------------|---------------------|-------|-------|-------|
|                  | Occ               | Soc                | Symp               | Occ                 | Soc                | Symp                | Occ   | Soc   | Symp  |
| Verbal memory    | 0.08 <sup>a</sup> | 0.11 <sup>a</sup>  | 0.14 <sup>a</sup>  | 0.35* <sup>a</sup>  | 0.22 <sup>a</sup>  | 0.32* <sup>a</sup>  | 0.23  | 0.19  | -0.06 |
| Digit sequencing | 0.18 <sup>a</sup> | 0.13 <sup>a</sup>  | 0.07 <sup>a</sup>  | 0.28 <sup>a</sup>   | 0.09 <sup>a</sup>  | 0.42** <sup>a</sup> | 0.13  | 0.10  | 0.15  |
| Token motor task | 0.19 <sup>a</sup> | -0.12 <sup>a</sup> | -0.21 <sup>a</sup> | 0.25 <sup>a</sup>   | 0.03 <sup>a</sup>  | 0.21 <sup>a</sup>   | 0.10  | 0.23  | 0.19  |
| Semantic fluency | 0.07 <sup>a</sup> | 0.14 <sup>a</sup>  | -0.07 <sup>a</sup> | 0.32* <sup>a</sup>  | 0.18 <sup>a</sup>  | 0.26 <sup>a</sup>   | 0.001 | 0.16  | 0.08  |
| Symbol coding    | 0.23 <sup>a</sup> | 0.07 <sup>a</sup>  | -0.04 <sup>a</sup> | 0.45** <sup>a</sup> | 0.33* <sup>a</sup> | 0.27 <sup>a</sup>   | 0.01  | -0.06 | 0.01  |
| Tower of London  | 0.09 <sup>a</sup> | 0.18 <sup>a</sup>  | 0.17 <sup>a</sup>  | 0.26 <sup>a</sup>   | 0.26 <sup>a</sup>  | 0.30* <sup>a</sup>  | 0.07  | -0.11 | -0.01 |

\* $p < 0.05$ , \*\* $p < 0.01$

Note: <sup>a</sup> Pearson's correlation

Abbreviations: Brief Assessment of Cognition in Schizophrenia, BACS; MIRECC-GAF Occupational functioning, Occ; MIRECC-GAF Social functioning, Soc; MIRECC-GAF Symptomatic functioning, Symp
