# Supplementary material for: The Impact of Negative Symptoms and Neurocognition on Functioning in MDD and Schizophrenia
Source: PubMed Central journal article supplement (PMC8350050; doi:10.3389/fpsyt.2021.648108), 2021-07-26
Supplement: Table_3.pdf [file Table_3.pdf]

**Table 3. Association between PHQ-9 and NSA-16**

| NSA-16 domains     | MDD                 | SCZ               | HC                 |
|--------------------|---------------------|-------------------|--------------------|
| Communication      | 0.18 <sup>a</sup>   | 0.28 <sup>a</sup> | 0.34*              |
| Emotion/Affect     | 0.17 <sup>a</sup>   | 0.08 <sup>a</sup> | -0.11 <sup>a</sup> |
| Social involvement | 0.02 <sup>a</sup>   | 0.19 <sup>a</sup> | -0.08              |
| Motivation         | 0.36** <sup>a</sup> | 0.16 <sup>a</sup> | 0.09 <sup>a</sup>  |
| Motor retardation  | 0.25 <sup>a</sup>   | 0.20 <sup>a</sup> | 0.03 <sup>a</sup>  |
| Total              | 0.29* <sup>a</sup>  | 0.25 <sup>a</sup> | 0.15               |

\* $p < 0.05$ , \*\* $p < 0.01$

Note: <sup>a</sup> Pearson's correlation

Abbreviations: Negative Symptom Assessment, NSA-16; Patient Health Questionnaire, PHQ-9
